# Supplementary material
Source: HighWire-hosted journal article supplement (https://bmjopen.bmj.com/content/8/2/e020870)
Supplement: inline-supplementary-material-1 [file inline-supplementary-material-1.pdf]

## James Lind Alliance Priority Setting Partnership on primary care patient safety

Page 1

### James Lind Alliance Priority Setting Partnership on primary care patient safety

1. The NIHR Greater Manchester PSTRC is working with the James Lind Alliance to identify and prioritise the most important issues for research in primary care patient safety. If you have important unanswered questions about patient safety in primary care please describe them below.

For more information and the participant information sheet [Read the Information Sheet](#)

We are seeking to identify priorities for research about safety in primary care. Primary care includes your GP surgery, dental surgery, pharmacy, out of hours care, walk in clinic, community or district nursing, ambulance and opticians.

Only complete this survey if you are over 16 years of age. If you are 16 or 17 years old please tick below to show that you consent to take part in this survey.

- I am aged 16 or 17 and consent to take part in this survey

2. **What are your questions for researchers to answer about patient safety in primary care?**

If you have more than one question for researchers to answer please list all questions with numbers to clearly indicate each new question.

3. If you did not answer the question above asking you to suggest questions for researchers to answer about patient safety in primary care, is this because

- you have no questions about primary care for researchers to answer  
 you did not understand the question  
 Other, please specify

4. The following questions are all optional.

### How old are you?

- 16 to 24 years
- 25 to 34 years
- 35 to 44 years
- 45 to 54 years
- 55 to 64 years
- 65 to 74 years
- 75 and over
- Prefer not to say

5. **Do you live in England, Wales, Scotland or Northern Ireland?**

- Yes
- No
- Prefer not to say
- If yes, please enter the first 2 letters of your postcode below

6. **What is your highest level of education?**

- No qualifications
- 1 to 4 GCSEs or equivalent
- 5 or more GCSEs or equivalent
- Apprenticeship
- 2 or more A levels or equivalent
- Degree level or above
- Other qualifications
- Prefer not to say
- Other, please specify

7. **What is your ethnic group? Choose one option that best describes your ethnic group or background**

- White
- Asian or Asian British: Indian
- Asian or Asian British: Pakistani
- Asian or Asian British: Bangladeshi
- Asian or Asian British: Chinese
- Asian or Asian British: Other
- Black or Black British: African
- Black or Black British: Caribbean
- Black or Black British: Other
- White and Black Caribbean
- White and Black African
- White and Asian
- Arab
- Prefer not to say
- Other, specify (optional)

8. **Do you, personally, work as a Healthcare Professional in any capacity? For example, a doctor/nurse/therapist/pharmacist/health service researcher/other NHS staff, etc. (if retired answer for your previous work)**

- Yes
- No
- Don't know
- Prefer not to say

9. How do you describe your gender?

- Female
- Male
- In another way
- Prefer not to say

10. Is your gender identity the same as the gender you were given at birth?

- Yes
- No
- Do not understand the question
- Prefer not to say

11. Which best describes you?

- Lesbian/Gay
- Bisexual
- Heterosexual/Straight
- Other
- Prefer not to say
