# Supplementary material
Source: HighWire-hosted journal article supplement (https://bmjopen.bmj.com/content/8/2/e020870)
Supplement: inline-supplementary-material-2 [file inline-supplementary-material-2.pdf]

## Online supplementary file 2: the top 60 research priorities

|    |                                                                                                                                                                                                                      |
|----|----------------------------------------------------------------------------------------------------------------------------------------------------------------------------------------------------------------------|
| 1  | What is the role of the receptionist in patient safety; i.e. facilitating access to urgent appointments?                                                                                                             |
| 2  | Do GP practices keep patient records up to date to ensure safety when a patient is seen by a different GP?                                                                                                           |
| 3  | Do patients have thoughts on what is safe and unsafe practice and would they know how and where to escalate any concerns?                                                                                            |
| 4  | Does seeing a named GP who knows an individual have safer care than seeing a GP who doesn't know me?                                                                                                                 |
| 5  | How does continuity of care influence patient safety?                                                                                                                                                                |
| 6  | How is patient safety and patient harm monitored in primary care?                                                                                                                                                    |
| 7  | How many patients actually know what medication they are taking; what for and what the potential side effects are?                                                                                                   |
| 8  | What can be done to make polypharmacy safer?                                                                                                                                                                         |
| 9  | What is the impact of pharmacy input in the GP surgery?                                                                                                                                                              |
| 10 | Do GPs and other health care professionals record patients who are vulnerable/at risk in the patient notes?                                                                                                          |
| 11 | Do patients referred to their community pharmacist by their hospital pharmacist for post-discharge support with their medicines have improved levels of medicines safety and medicines adherence?                    |
| 12 | How can patient safety be assured for the most vulnerable in society (e.g. people who are frail; have mental health problems; cognitive impairments; learning difficulties; disabilities; and poor health literacy)? |
| 13 | How frequent are the misdiagnosis of symptoms by GPs resulting in patient safety incidents?                                                                                                                          |
| 14 | How safe are phone consultations compared to face to face with one's GP?                                                                                                                                             |
| 15 | How well trained are receptionists as acting as gatekeepers to GPs and prioritising patients?                                                                                                                        |
| 16 | In what ways does work intensity; hours worked & staffing levels affect patient safety/near misses?                                                                                                                  |
| 17 | What can be done to improve access to GP surgery for someone with mental health problems?                                                                                                                            |
| 18 | What can Primary Care do to identify and support people who may be at risk of suicide?                                                                                                                               |

|    |                                                                                                                                                                                |
|----|--------------------------------------------------------------------------------------------------------------------------------------------------------------------------------|
| 19 | What do patients understand about when they should or shouldn't contact a GP; and who they should see instead?                                                                 |
| 20 | What team working methods/cultures promote a safer approach?                                                                                                                   |
| 21 | What types of prescribing errors are occurring in GP prescribing practice and how often are they occurring?                                                                    |
| 22 | Would a co-ordinated / holistic / overview approach to individual patients and families improve patient safety?                                                                |
| 23 | How can we encourage a culture that learns from patient safety incidents?                                                                                                      |
| 24 | How can we encourage patients and clinicians to be more open about patient safety incidents; within a culture of learning rather than blame?                                   |
| 25 | What tools could help practitioners balance safety/costs/workload/accessibility/quality?                                                                                       |
| 26 | Are difficulties in contacting doctors and/or making appointments associated with more delays or errors in diagnosis; or other failures of care?                               |
| 27 | Do clinicians ask patients if they understand the questions they are being asked and if they feel safe?                                                                        |
| 28 | Do the actions of receptionists have potential ramifications for patient safety?                                                                                               |
| 29 | Does safety consciousness lead to anxiety and over compensation i.e. too much risk averseness?                                                                                 |
| 30 | Does the provision of detailed blood test data to patients lead to them managing their condition better?                                                                       |
| 31 | How can communication between health care professionals be improved for people with multiple long term conditions?                                                             |
| 32 | How can information within patient medical records be made available to patients and care providers in a way that protects privacy and improves safety and quality of care?    |
| 33 | How can patient safety reporting be made simple and action on reporting made effective?                                                                                        |
| 34 | How can patients best be informed about GPs with special interests in the practice they attend; in order to direct them to the most suitable doctor or nurse for consultation? |
| 35 | How can risks be mitigated to allow for safe; complex care at home?                                                                                                            |

|    |                                                                                                                                                                                                |
|----|------------------------------------------------------------------------------------------------------------------------------------------------------------------------------------------------|
| 36 | How can we enable individual Practices to share their significant event audits and outcomes with each other in a way which promotes patient safer care?                                        |
| 37 | How can we improve safe communication and co-ordination of care between Primary and Secondary care?                                                                                            |
| 38 | How can we make sure that the whole patient is treated; not just one condition and with mental health and physical health both being treated together?                                         |
| 39 | How do GPs inform their patients of the side effects and potential risks when prescribing a new medication?                                                                                    |
| 40 | How well do patients understand the information that has been conveyed to them during the consultation?                                                                                        |
| 41 | In the backdrop of health and social care devolution; what are the risks to patient safety as services transform and the system transitions?                                                   |
| 42 | Is lack of continuity of care by a single doctor in a joint practice associated with more delays or errors in diagnosis?                                                                       |
| 43 | Is there a clear understanding of patient safety in general practice?                                                                                                                          |
| 44 | What are the diagnostic success rates of GPs when compared to their final diagnosis for a patient?                                                                                             |
| 45 | What are the safe frequencies of medication review?                                                                                                                                            |
| 46 | What can be done to help GPs or nurse practitioners decide when the use of antibiotics is necessary?                                                                                           |
| 47 | What kinds; seriousness; and frequency; of harms happen to patients in primary care?                                                                                                           |
| 48 | What proportion of national guidelines and National Institute for Health and Care Excellence recommendations are followed and monitored?                                                       |
| 49 | What proportion of patients tell their GPs about anything else they may be taking (e.g. homeopathy; cannabis etc.) that may conflict with medications?                                         |
| 50 | What steps can be taken to improve patient safety in out of hours care?                                                                                                                        |
| 51 | Which type practitioner (GP; advanced nurse practitioner; practice nurse; etc.) is safest to see which types of patients (acute illnesses; acute on chronic; multi-morbid; long-term illness)? |
| 52 | Why do some patients not engage with their healthcare and so not attend all/some of their health checks?                                                                                       |
| 53 | Why is it that doctors do not listen to carer's concerns?                                                                                                                                      |

|    |                                                                                                                               |
|----|-------------------------------------------------------------------------------------------------------------------------------|
| 54 | Why is there such a time lag between seeing the hospital consultant and the GP getting information about a medication change? |
| 55 | Are patients with a disability particularly vulnerable to unsafe primary care and; if so; how can this be improved?           |
| 56 | Are their harmful outcomes from excessive attention to safety?                                                                |
| 57 | How are medical errors in primary care prevented and recorded?                                                                |
| 58 | How can GP practices appointment systems (e.g. telephone; online) be improved?                                                |
| 59 | How often do GPs report side effects; what is the level of under-reporting and how can it be improved?                        |
| 60 | How safe is treatment in out of hours care if patient notes are not available?                                                |
